# Supplementary material for: Structure of the transporter associated with antigen processing trapped by herpes simplex virus
Source: eLife. 2016 Dec 9;5:e21829. doi: 10.7554/eLife.21829 (PMC5199193; doi:10.7554/eLife.21829)
Supplement: Figure 1—source data 1. — FSC values from Frealign between unfiltered reconstructions of two independently refined half data sets indicating the resolution of the reconstruction (FSC). DOI: http://dx.doi.org/10.7554/eLife.21829.004 [file elife-21829-fig1-data1.xlsx]

## Sheet: Sheet1
Resolution (Angstroms)	Resolution (1/Angstroms)	Part_FSC from Frealign
266.24	0.00375601	1
133.12	0.00751202	1
88.75	0.0112676	1
66.56	0.015024	1
53.25	0.0187793	1
44.37	0.0225378	1
38.03	0.026295	1
33.28	0.0300481	1
29.58	0.0338066	1
26.62	0.0375657	1
24.2	0.0413223	1
22.19	0.0450653	1
20.48	0.0488281	1
19.02	0.0525762	1
17.75	0.056338	1
16.64	0.0600962	1
15.66	0.063857	1
14.79	0.0676133	1
14.01	0.0713776	1
13.31	0.0751315	1
12.68	0.0788644	1
12.1	0.0826446	1
11.58	0.0863558	1
11.09	0.0901713	1
10.65	0.0938967	1
10.24	0.0976562	1
9.86	0.10142	1
9.51	0.105152	1
9.18	0.108932	1
8.87	0.11274	1
8.59	0.116414	1
8.32	0.120192	0.999
8.07	0.123916	0.999
7.83	0.127714	0.998
7.61	0.131406	0.996
7.4	0.135135	0.994
7.2	0.138889	0.992
7.01	0.142653	0.989
6.83	0.146413	0.986
6.66	0.15015	0.981
6.49	0.154083	0.974
6.34	0.157729	0.965
6.19	0.161551	0.95
6.05	0.165289	0.911
5.92	0.168919	0.801
5.79	0.172712	0.668
5.66	0.176678	0.635
5.55	0.18018	0.622
5.43	0.184162	0.602
5.32	0.18797	0.591
5.22	0.191571	0.594
5.12	0.195312	0.588
5.02	0.199203	0.572
4.93	0.20284	0.541
4.84	0.206612	0.522
4.75	0.210526	0.488
4.67	0.214133	0.441
4.59	0.217865	0.371
4.51	0.221729	0.334
4.44	0.225225	0.292
4.36	0.229358	0.228
4.29	0.2331	0.198
4.23	0.236407	0.18
4.16	0.240385	0.215
4.1	0.243902	0.153
4.03	0.248139	0.175
3.97	0.251889	0.178
3.92	0.255102	0.02
3.86	0.259067	0.037
3.8	0.263158	0.051
3.75	0.266667	0.089
3.7	0.27027	0.113
3.65	0.273973	-0.009
3.6	0.277778	-0.021
3.55	0.28169	0.069
3.5	0.285714	0.051
3.46	0.289017	0.115
3.41	0.293255	0.134
3.37	0.296736	0.026
3.33	0.3003	-0.084
3.29	0.303951	-0.1
3.25	0.307692	-0.035
3.21	0.311526	0.048
3.17	0.315457	0.052
3.13	0.319489	0.032
3.1	0.322581	0.025
3.06	0.326797	-0.028
3.03	0.330033	-0.104
2.99	0.334448	-0.119
2.96	0.337838	-0.054
2.93	0.341297	0.084
2.89	0.346021	0.043
2.86	0.34965	-0.077
2.83	0.353357	-0.059
2.8	0.357143	0.032
2.77	0.361011	0.047
2.74	0.364964	-0.018
2.72	0.367647	-0.058
2.69	0.371747	-0.012
2.66	0.37594	0.002
2.64	0.378788	-0.027
2.61	0.383142	-0.033
2.58	0.387597	-0.016
2.56	0.390625	-0.055
2.54	0.393701	0.006
2.51	0.398406	0.032
2.49	0.401606	-0.023
2.47	0.404858	-0.004
2.44	0.409836	-0.034
2.42	0.413223	-0.031
2.4	0.416667	-0.007
2.38	0.420168	-0.082
2.36	0.423729	-0.074
2.34	0.42735	-0.046
2.32	0.431034	-0.064
2.3	0.434783	-0.008
2.28	0.438596	0.036
2.26	0.442478	0.008
2.24	0.446429	-0.001
2.22	0.45045	0.03
2.2	0.454545	0.024
2.18	0.458716	-0.015
2.16	0.462963	-0.042
2.15	0.465116	-0.028
2.13	0.469484	0
2.11	0.473934	-0.032
2.1	0.47619	-0.028
2.08	0.480769	0.006
