# Supplementary material for: Structure of the transporter associated with antigen processing trapped by herpes simplex virus
Source: eLife. 2016 Dec 9;5:e21829. doi: 10.7554/eLife.21829 (PMC5199193; doi:10.7554/eLife.21829)
Supplement: Figure 1—source data 2. — FSC values calculated between the structure model and the half map used for refinement, the other half map, and the full map. DOI: http://dx.doi.org/10.7554/eLife.21829.005 [file elife-21829-fig1-data2.xlsx]

## Sheet: Sheet1
266.24	Resolution1/Angstrom	FSC full map vs model	FSC half map1 vs model	FSC half map2 vs model
133.12	0.00375601	0.9993	0.9996	0.9995
88.7463	0.00751202	0.9954	0.9969	0.9969
66.56	0.0112681	0.9762	0.983	0.9831
53.2479	0.015024	0.9561	0.9638	0.9638
44.3733	0.0187801	0.9441	0.949	0.9488
38.0342	0.0225361	0.9308	0.9356	0.9355
33.28	0.0262921	0.9324	0.9387	0.9388
29.5822	0.0300481	0.9256	0.9344	0.9346
26.624	0.0338041	0.9104	0.9144	0.9144
24.2036	0.0375601	0.8687	0.872	0.8723
22.1867	0.0413162	0.875	0.8787	0.8792
20.48	0.045072	0.906	0.9104	0.9111
19.0171	0.0488281	0.9022	0.9083	0.9085
17.7493	0.0525843	0.9224	0.9255	0.9259
16.64	0.0563403	0.9341	0.9353	0.936
15.6612	0.0600962	0.9435	0.9441	0.9451
14.7911	0.0638521	0.9532	0.9531	0.9541
14.0126	0.0676082	0.9613	0.9612	0.9619
13.312	0.0713643	0.9611	0.9611	0.9616
12.6781	0.0751202	0.9628	0.9628	0.9631
12.1018	0.0788762	0.9685	0.9684	0.9687
11.5756	0.0826323	0.9689	0.9684	0.9685
11.0933	0.0863886	0.9654	0.9649	0.9648
10.6496	0.0901445	0.9594	0.9586	0.9587
10.2403	0.0939002	0.9558	0.9551	0.9555
9.8606	0.0976534	0.9545	0.9542	0.9546
9.5081	0.101414	0.9486	0.9491	0.9494
9.1808	0.105173	0.9422	0.9435	0.9435
8.8745	0.108923	0.9331	0.9354	0.935
8.5887	0.112682	0.9226	0.9256	0.9251
8.32	0.116432	0.9051	0.9091	0.9086
8.0676	0.120192	0.8823	0.8868	0.8865
7.8307	0.123953	0.8605	0.8649	0.8647
7.6068	0.127703	0.8313	0.836	0.8356
7.3953	0.131461	0.817	0.8218	0.8205
7.1957	0.135221	0.8154	0.8189	0.8179
7.0062	0.138972	0.8171	0.8187	0.8201
6.8268	0.142731	0.8209	0.8227	0.8229
6.656	0.146482	0.8245	0.827	0.8239
6.4935	0.15024	0.8146	0.8159	0.8126
6.3391	0.154	0.7888	0.7882	0.7847
6.1916	0.157751	0.7771	0.7733	0.7685
6.0507	0.161509	0.7776	0.7718	0.7612
5.9165	0.16527	0.7785	0.7691	0.751
5.7877	0.169019	0.7629	0.7481	0.7199
5.6648	0.17278	0.7429	0.7261	0.6743
5.5467	0.176529	0.7297	0.7056	0.6473
5.4334	0.180287	0.7363	0.7051	0.6529
5.3249	0.184047	0.7531	0.7151	0.6752
5.2204	0.187797	0.7559	0.7087	0.6882
5.1199	0.191556	0.7412	0.6992	0.667
5.0234	0.195316	0.7404	0.697	0.6616
4.9303	0.199068	0.742	0.692	0.6607
4.8408	0.202827	0.7381	0.6856	0.6543
4.7543	0.206577	0.7272	0.6783	0.6349
4.6708	0.210336	0.7227	0.6742	0.6248
4.5904	0.214096	0.7099	0.6581	0.6128
4.5125	0.217846	0.6889	0.6228	0.5999
4.4372	0.221607	0.6447	0.5759	0.5421
4.3646	0.225367	0.5893	0.5195	0.4762
4.2941	0.229116	0.5258	0.455	0.4148
4.2261	0.232878	0.4604	0.4119	0.338
4.16	0.236625	0.4402	0.4146	0.3022
4.0959	0.240385	0.4178	0.3855	0.2961
4.034	0.244147	0.3734	0.3195	0.2833
3.9737	0.247893	0.311	0.217	0.2738
3.9152	0.251655	0.238	0.1448	0.2297
3.8586	0.255415	0.1931	0.1421	0.1614
3.8034	0.259161	0.1001	0.0821	0.0708
3.7499	0.262923	-0.0108	-0.0382	0.0194
3.6978	0.266674	-0.0211	-0.0378	0.0111
3.6471	0.270431	0.0403	0.023	0.0175
3.5979	0.27419	0.019	0.0077	-0.019
3.5499	0.27794	0.0054	0.018	-0.0409
3.5031	0.281698	0.0105	0.0222	-0.0227
3.4577	0.285461	0.0371	0.0416	-0.011
3.4133	0.28921	0.0299	0.0296	-0.0008
3.3702	0.292972	0.0473	0.0167	0.0537
3.328	0.296718	0.0758	0.0263	0.0962
3.2869	0.300481	0.0539	0.0321	0.0631
3.2469	0.304238	0.0329	0.0249	0.0335
3.2077	0.307986	0.0468	0.0265	0.043
3.1695	0.31175	-0.0091	-0.0257	0.0018
3.1322	0.315507	-0.0444	-0.0303	-0.0493
3.0958	0.319264	-0.03	0.0026	-0.062
3.0603	0.323018	-0.0491	-0.0185	-0.0672
3.0255	0.326765	-0.0335	-0.0521	-0.016
2.9914	0.330524	-0.0062	-0.033	0.0017
2.9582	0.334292	0.0099	0.0021	0.0121
2.9257	0.338043	0.0344	0.0516	0.0136
2.8939	0.341799	0.0673	0.0671	0.0463
2.8628	0.345554	0.0379	0.0122	0.0502
2.8323	0.349308	-0.0081	-0.021	0.0165
2.8026	0.35307	-0.0014	0.0179	-0.0133
2.7733	0.356812	0.0036	0.0299	-0.0216
2.7447	0.360581	-0.0243	-0.0108	-0.0292
2.7168	0.364339	-0.0396	-0.0277	-0.0274
2.6893	0.36808	-0.0185	-0.019	-0.0059
2.6624	0.371844	-0.005	-0.0032	0.0033
2.636	0.375601	-0.018	-0.0109	-0.0101
2.6102	0.379363	0.0022	-0.0047	0.004
2.5849	0.383112	0.0342	0.0253	0.0224
2.56	0.386862	0.0188	0.0258	0.0017
2.5356	0.390625	-0.0081	-0.0052	-0.0125
2.5117	0.394384	0.0042	-0.0096	0.0085
2.4882	0.398137	-0.0099	-0.015	-0.0057
2.4652	0.401897	-0.0286	-0.0255	-0.0216
2.4426	0.405647	0.0005	0.0006	0.004
2.4203	0.4094	0.015	0.0131	0.0104
2.3986	0.413172	0.0101	0.0112	0.0032
2.3771	0.41691	0.0052	0.0045	0.0054
2.3561	0.420681	-0.0013	-0.0026	0.0045
2.3355	0.42443	-0.026	-0.0249	-0.0176
2.3151	0.428174	-0.0294	-0.0255	-0.023
2.2951	0.431947	-0.0133	-0.0089	-0.0182
2.2756	0.435711	0.0052	0.0112	-0.0043
2.2563	0.439445	0.0112	0.0239	0.0001
2.2373	0.443203	-0.0008	0.0057	-0.004
2.2187	0.446967	-0.0071	-0.0027	-0.0084
2.2003	0.450714	0.0011	0.0009	0.0008
2.1823	0.454483	0.0147	0.0103	0.0152
2.1645	0.458232	0.0133	0.0114	0.0119
2.1471	0.462	0.0296	0.019	0.0358
2.1299	0.465744	0.0147	0.0071	0.0237
2.113	0.469506	0.022	0.0266	0.0214
2.0964	0.473261	0.0203	0.0201	0.0189
2.08	0.477008	0.0026	-0.0008	0.0007
	0.480769	-0.0089	-0.0134	-0.007
